# Supplementary material
Source: PubMed Central journal article supplement (PMC5079493)
Supplement: 10.3163.1536-5050.104.4.010.sg001.pdf [file 10.3163.1536-5050.104.4.010.sg001.pdf]

## Research data services in veterinary medicine libraries

*Erin E. Kerby, MSI*

### APPENDIX

#### Survey

1. Which of the following best describes veterinary medicine library services at your institution or organization?

- a. Unit or librarian within a veterinary school
  - b. Branch library within a university library system
  - c. Librarian in a university library
  - d. Unit, department, or librarian within a nonprofit organization
  - e. Unit, department, or librarian within a corporate organization
  - f. Other (please specify:)
- 

2. Does your institution or organization currently provide research data services?

- a. No
- b. Not that I am aware of
- c. I think so
- d. Yes

3. Which of the following departments or units provide research data services at your institution or organization? Check all that apply.

- a. Veterinary medicine library
  - b. University library
  - c. Veterinary school
  - d. Institution or organization information technology (IT) unit
  - e. Other department or unit (please specify:)
- 

4. Please describe the types of research data services offered by your institution or organization.

---

5. Currently, how much of a priority are research data services at your library?

- a. Not a priority
- b. Low priority
- c. Neutral
- d. Moderate priority
- e. High priority

6. Do you believe that research data services should be part of your library's core mission?

- a. Very untrue of what I believe
- b. Untrue of what I believe
- c. Somewhat untrue of what I believe
- d. Neutral
- e. Somewhat true of what I believe
- f. True of what I believe
- g. Very true of what I believe

7. As part of your regular job responsibilities, do you support faculty, students, staff, or researchers in their research data management activities?

- a. Never
- b. Rarely [skip to Q.9]
- c. Occasionally [skip to Q.9]
- d. A moderate amount [skip to Q.9]
- e. A great deal [skip to Q.9]

8. Which of the following would motivate you to become involved in research data services?

Check all that apply. [skip to Q.11]

- a. If research data services became a responsibility of my job
- b. If I learned more about research data services
- c. If research data services became important to the subject disciplines (people?) I support
- d. If my institution or organization became more involved in research data services
- e. If my institution or organization developed an institutional repository that accepted data
- f. If more external funding agencies require research data services
- g. If my patrons requested research data services
- h. Other:

---

9. What is the *single* most important motivation for your involvement in research data services?

- a. My primary job responsibilities include research data services
- b. My patrons have requested research data services
- c. My professional interests include research data services
- d. My research interests include research data services
- e. Other (please specify):

---

10. What are other motivations for your involvement in research data services? Check all that apply.

- a. My primary job responsibilities include research data services
  - b. My patrons have requested research data services
  - c. My professional interests include research data services
  - d. My research interests include research data services
  - e. Other (please specify):
-

11. Taking into account your skills and knowledge, how prepared do you feel to support researchers at your institution or organization with their data management needs?

- a. Not at all prepared
  - b. Slightly prepared
  - c. Somewhat prepared
  - d. Moderately prepared
  - e. Extremely prepared
  - f. Please explain the reason(s) for your answer:
- 

12. Is time a barrier to your providing research data services?

- a. Not a barrier
- b. Somewhat of a barrier
- c. Moderate barrier
- d. Significant barrier
- e. Extreme barrier

13. How important to you are research data services in comparison to the other activities you provide for patrons?

- a. Not at all important
- b. Somewhat less important
- c. Just as important
- d. Somewhat more important
- e. A great deal more important

14. In your estimation, how important are research data services to the advancement of veterinary research?

- a. Not at all important
  - b. Slightly important
  - c. Neutral
  - d. Moderately important
  - e. Very important
  - f. Please explain the reason(s) for your answer:
- 

15. Have you ever participated in any research data services training?

- a. No, and never considered it
- b. No, but have considered it
- c. Yes, but would *not* consider doing more
- d. Yes, and would consider doing more

16. Does your library or institution directly provide any research data services training to you?

- a. No
- b. Not that I am aware of
- c. I think so
- d. Yes

17. Does your library or institution provide support for you to attend research data services training or conferences?

- a. No
- b. Not that I am aware of
- c. I think so
- d. Yes

18. Do you have any other comments you would like to share?

---
